# Supplementary material
Source: PubMed Central journal article supplement (PMC3994896)
Supplement: NIHMS547494-supplement-supplement_1.pdf [file NIHMS547494-supplement-supplement_1.pdf]

**Supplemental Table 1:** Average anti-CCP2 and RF titers by subgroup

|                  | average aCCP titer (AU) | average RF titer (IU) |
|------------------|-------------------------|-----------------------|
| <b>aCCP+/RF-</b> | 275.8542                | -                     |
| <b>aCCP-/RF+</b> | -                       | 329.0375              |
| <b>aCCP+/RF+</b> | 273.6465                | 328.1268              |
